# Supplementary material for: Numerical study on the hydrodynamics of thunniform bio-inspired swimming under self-propulsion
Source: PLoS One. 2017 Mar 31;12(3):e0174740. doi: 10.1371/journal.pone.0174740 (PMC5375146; doi:10.1371/journal.pone.0174740)
Supplement: S2 Spreadsheet — (XLS) [file pone.0174740.s002.xls]

## Sheet: Sheet1
f	Vs of Cheng	Vs of Present simulation		t	U
0.6	0.438	0.468		0	0
0.8	0.625	0.607		0.005	0.000758919
1	0.679	0.666		0.01	0.00144467
1.2	0.822	0.837		0.015	0.00206137
1.33	1.009	1.023		0.02	0.00261313
				0.025	0.00310408
				0.03	0.00353833
				0.035	0.00391999
				0.04	0.00425318
				0.045	0.00454202
				0.05	0.00479063
				0.055	0.00500311
				0.06	0.0051836
				0.065	0.0053362
				0.07	0.00546503
				0.075	0.00557422
				0.08	0.00566786
				0.085	0.00575064
				0.09	0.00583082
				0.095	0.00591813
				0.1	0.00602228
				0.105	0.00615301
				0.11	0.00632002
				0.115	0.00653306
				0.12	0.00680184
				0.125	0.00713608
				0.13	0.00754552
				0.135	0.00803987
				0.14	0.00862886
				0.145	0.00932221
				0.15	0.0101296
				0.155	0.0110609
				0.16	0.0121257
				0.165	0.0133327
				0.17	0.0146793
				0.175	0.0161557
				0.18	0.017752
				0.185	0.0194583
				0.19	0.0212647
				0.195	0.0231613
				0.2	0.0251382
				0.205	0.0271854
				0.21	0.0292932
				0.215	0.0314515
				0.22	0.0336505
				0.225	0.0358804
				0.23	0.038131
				0.235	0.0403927
				0.24	0.0426555
				0.245	0.0449096
				0.25	0.0471499
				0.255	0.0493753
				0.26	0.0515851
				0.265	0.0537784
				0.27	0.0559545
				0.275	0.0581125
				0.28	0.0602516
				0.285	0.062371
				0.29	0.06447
				0.295	0.0665476
				0.3	0.0686032
				0.305	0.0706358
				0.31	0.0726448
				0.315	0.0746292
				0.32	0.0765883
				0.325	0.0785213
				0.33	0.0804282
				0.335	0.0823107
				0.34	0.0841701
				0.345	0.0860081
				0.35	0.0878261
				0.355	0.0896258
				0.36	0.0914087
				0.365	0.0931763
				0.37	0.0949303
				0.375	0.096672
				0.38	0.0984032
				0.385	0.100125
				0.39	0.10184
				0.395	0.103549
				0.4	0.105253
				0.405	0.106954
				0.41	0.108654
				0.415	0.110354
				0.42	0.112056
				0.425	0.113762
				0.43	0.115472
				0.435	0.117189
				0.44	0.118914
				0.445	0.120648
				0.45	0.122392
				0.455	0.124146
				0.46	0.125907
				0.465	0.127675
				0.47	0.129447
				0.475	0.131221
				0.48	0.132997
				0.485	0.134773
				0.49	0.136546
				0.495	0.138317
				0.5	0.140082
				0.505	0.141841
				0.51	0.143591
				0.515	0.145332
				0.52	0.147061
				0.525	0.148777
				0.53	0.150479
				0.535	0.152167
				0.54	0.15384
				0.545	0.155498
				0.55	0.15714
				0.555	0.158768
				0.56	0.160381
				0.565	0.161979
				0.57	0.163561
				0.575	0.165128
				0.58	0.16668
				0.585	0.168216
				0.59	0.169737
				0.595	0.171241
				0.6	0.17273
				0.605	0.174203
				0.61	0.17566
				0.615	0.177101
				0.62	0.178526
				0.625	0.179935
				0.63	0.181327
				0.635	0.182703
				0.64	0.184062
				0.645	0.185405
				0.65	0.186732
				0.655	0.188043
				0.66	0.189343
				0.665	0.190634
				0.67	0.191919
				0.675	0.1932
				0.68	0.194481
				0.685	0.195764
				0.69	0.197053
				0.695	0.19835
				0.7	0.199657
				0.705	0.200979
				0.71	0.202317
				0.715	0.203675
				0.72	0.205055
				0.725	0.20646
				0.73	0.207893
				0.735	0.209357
				0.74	0.210855
				0.745	0.21239
				0.75	0.213963
				0.755	0.21558
				0.76	0.217241
				0.765	0.218951
				0.77	0.220711
				0.775	0.22252
				0.78	0.224374
				0.785	0.226265
				0.79	0.228189
				0.795	0.23014
				0.8	0.232111
				0.805	0.234097
				0.81	0.236093
				0.815	0.238092
				0.82	0.240088
				0.825	0.242077
				0.83	0.244052
				0.835	0.246007
				0.84	0.247936
				0.845	0.249835
				0.85	0.251696
				0.855	0.253517
				0.86	0.255299
				0.865	0.257043
				0.87	0.258749
				0.875	0.26042
				0.88	0.262057
				0.885	0.26366
				0.89	0.265232
				0.895	0.266772
				0.9	0.268283
				0.905	0.269766
				0.91	0.271222
				0.915	0.272652
				0.92	0.274057
				0.925	0.275439
				0.93	0.276799
				0.935	0.278139
				0.94	0.279458
				0.945	0.280759
				0.95	0.282044
				0.955	0.283312
				0.96	0.284565
				0.965	0.285805
				0.97	0.287033
				0.975	0.28825
				0.98	0.289458
				0.985	0.290657
				0.99	0.291848
				0.995	0.293034
				1	0.294215
				1.005	0.295392
				1.01	0.296567
				1.015	0.297741
				1.02	0.298914
				1.025	0.300088
				1.03	0.301261
				1.035	0.302435
				1.04	0.30361
				1.045	0.304786
				1.05	0.305965
				1.055	0.307146
				1.06	0.308329
				1.065	0.309516
				1.07	0.310706
				1.075	0.3119
				1.08	0.313098
				1.085	0.314302
				1.09	0.31551
				1.095	0.316725
				1.1	0.317945
				1.105	0.319172
				1.11	0.320405
				1.115	0.321646
				1.12	0.322895
				1.125	0.324152
				1.13	0.325417
				1.135	0.326691
				1.14	0.327975
				1.145	0.329268
				1.15	0.330572
				1.155	0.331886
				1.16	0.333212
				1.165	0.334549
				1.17	0.335898
				1.175	0.337259
				1.18	0.338631
				1.185	0.340015
				1.19	0.341408
				1.195	0.34281
				1.2	0.344219
				1.205	0.345634
				1.21	0.347055
				1.215	0.348481
				1.22	0.349909
				1.225	0.35134
				1.23	0.352772
				1.235	0.354204
				1.24	0.355636
				1.245	0.357065
				1.25	0.358491
				1.255	0.359913
				1.26	0.36133
				1.265	0.36274
				1.27	0.364143
				1.275	0.365538
				1.28	0.366923
				1.285	0.368298
				1.29	0.369662
				1.295	0.371012
				1.3	0.37235
				1.305	0.373675
				1.31	0.374989
				1.315	0.376291
				1.32	0.377582
				1.325	0.378863
				1.33	0.380134
				1.335	0.381396
				1.34	0.38265
				1.345	0.383895
				1.35	0.385132
				1.355	0.386363
				1.36	0.387587
				1.365	0.388805
				1.37	0.390018
				1.375	0.391226
				1.38	0.39243
				1.385	0.39363
				1.39	0.394826
				1.395	0.39602
				1.4	0.397212
				1.405	0.398402
				1.41	0.399592
				1.415	0.40078
				1.42	0.401969
				1.425	0.403158
				1.43	0.404349
				1.435	0.405541
				1.44	0.406735
				1.445	0.407932
				1.45	0.409133
				1.455	0.410337
				1.46	0.411545
				1.465	0.412758
				1.47	0.413974
				1.475	0.415194
				1.48	0.416417
				1.485	0.417643
				1.49	0.418872
				1.495	0.420103
				1.5	0.421337
				1.505	0.422572
				1.51	0.42381
				1.515	0.425048
				1.52	0.426288
				1.525	0.427529
				1.53	0.42877
				1.535	0.430012
				1.54	0.431254
				1.545	0.432495
				1.55	0.433737
				1.555	0.434977
				1.56	0.436217
				1.565	0.437456
				1.57	0.438693
				1.575	0.439928
				1.58	0.441162
				1.585	0.442393
				1.59	0.443622
				1.595	0.444848
				1.6	0.446071
				1.605	0.44729
				1.61	0.448507
				1.615	0.449719
				1.62	0.450927
				1.625	0.452131
				1.63	0.453331
				1.635	0.454527
				1.64	0.455719
				1.645	0.456907
				1.65	0.45809
				1.655	0.45927
				1.66	0.460445
				1.665	0.461616
				1.67	0.462783
				1.675	0.463945
				1.68	0.465104
				1.685	0.466258
				1.69	0.467408
				1.695	0.468554
				1.7	0.469696
				1.705	0.470834
				1.71	0.471967
				1.715	0.473096
				1.72	0.474221
				1.725	0.475342
				1.73	0.476458
				1.735	0.477571
				1.74	0.478679
				1.745	0.479783
				1.75	0.480883
				1.755	0.481978
				1.76	0.483069
				1.765	0.484156
				1.77	0.485239
				1.775	0.486318
				1.78	0.487392
				1.785	0.488462
				1.79	0.489528
				1.795	0.490589
				1.8	0.491646
				1.805	0.492699
				1.81	0.493748
				1.815	0.494792
				1.82	0.495832
				1.825	0.496868
				1.83	0.4979
				1.835	0.498927
				1.84	0.49995
				1.845	0.500968
				1.85	0.501982
				1.855	0.502992
				1.86	0.503997
				1.865	0.504998
				1.87	0.505994
				1.875	0.506986
				1.88	0.507973
				1.885	0.508956
				1.89	0.509934
				1.895	0.510908
				1.9	0.511877
				1.905	0.512841
				1.91	0.513801
				1.915	0.514756
				1.92	0.515706
				1.925	0.516652
				1.93	0.517593
				1.935	0.51853
				1.94	0.519461
				1.945	0.520388
				1.95	0.52131
				1.955	0.522227
				1.96	0.52314
				1.965	0.524047
				1.97	0.52495
				1.975	0.525848
				1.98	0.526741
				1.985	0.527629
				1.99	0.528512
				1.995	0.52939
				2	0.530265
				2.005	0.531135
				2.01	0.532001
				2.015	0.532864
				2.02	0.533723
				2.025	0.534578
				2.03	0.535431
				2.035	0.53628
				2.04	0.537127
				2.045	0.537971
				2.05	0.538813
				2.055	0.539652
				2.06	0.540489
				2.065	0.541325
				2.07	0.542159
				2.075	0.542992
				2.08	0.543823
				2.085	0.544653
				2.09	0.545483
				2.095	0.546311
				2.1	0.54714
				2.105	0.547968
				2.11	0.548795
				2.115	0.549624
				2.12	0.550452
				2.125	0.551281
				2.13	0.55211
				2.135	0.552941
				2.14	0.553772
				2.145	0.554605
				2.15	0.555439
				2.155	0.556275
				2.16	0.557113
				2.165	0.557953
				2.17	0.558795
				2.175	0.55964
				2.18	0.560487
				2.185	0.561337
				2.19	0.56219
				2.195	0.563045
				2.2	0.563903
				2.205	0.564764
				2.21	0.565627
				2.215	0.566492
				2.22	0.56736
				2.225	0.56823
				2.23	0.569101
				2.235	0.569975
				2.24	0.57085
				2.245	0.571728
				2.25	0.572606
				2.255	0.573486
				2.26	0.574368
				2.265	0.575251
				2.27	0.576134
				2.275	0.577019
				2.28	0.577905
				2.285	0.578792
				2.29	0.57968
				2.295	0.580568
				2.3	0.581456
				2.305	0.582345
				2.31	0.583235
				2.315	0.584125
				2.32	0.585014
				2.325	0.585904
				2.33	0.586794
				2.335	0.587683
				2.34	0.588572
				2.345	0.589461
				2.35	0.590349
				2.355	0.591237
				2.36	0.592124
				2.365	0.59301
				2.37	0.593895
				2.375	0.594779
				2.38	0.595662
				2.385	0.596544
				2.39	0.597424
				2.395	0.598303
				2.4	0.599181
				2.405	0.600056
				2.41	0.60093
				2.415	0.601802
				2.42	0.602672
				2.425	0.60354
				2.43	0.604406
				2.435	0.60527
				2.44	0.606131
				2.445	0.606991
				2.45	0.607848
				2.455	0.608703
				2.46	0.609556
				2.465	0.610406
				2.47	0.611254
				2.475	0.612101
				2.48	0.612944
				2.485	0.613786
				2.49	0.614626
				2.495	0.615463
				2.5	0.616298
				2.505	0.617131
				2.51	0.617961
				2.515	0.618789
				2.52	0.619616
				2.525	0.620439
				2.53	0.621261
				2.535	0.62208
				2.54	0.622897
				2.545	0.623712
				2.55	0.624524
				2.555	0.625334
				2.56	0.626142
				2.565	0.626948
				2.57	0.627751
				2.575	0.628552
				2.58	0.629351
				2.585	0.630147
				2.59	0.630941
				2.595	0.631733
				2.6	0.632523
				2.605	0.63331
				2.61	0.634095
				2.615	0.634877
				2.62	0.635657
				2.625	0.636435
				2.63	0.637211
				2.635	0.637984
				2.64	0.638754
				2.645	0.639523
				2.65	0.640289
				2.655	0.641052
				2.66	0.641814
				2.665	0.642573
				2.67	0.643329
				2.675	0.644083
				2.68	0.644835
				2.685	0.645585
				2.69	0.646331
				2.695	0.647076
				2.7	0.647818
				2.705	0.648558
				2.71	0.649295
				2.715	0.65003
				2.72	0.650763
				2.725	0.651493
				2.73	0.652221
				2.735	0.652947
				2.74	0.65367
				2.745	0.654391
				2.75	0.65511
				2.755	0.655827
				2.76	0.656541
				2.765	0.657253
				2.77	0.657964
				2.775	0.658672
				2.78	0.659378
				2.785	0.660082
				2.79	0.660784
				2.795	0.661484
				2.8	0.662183
				2.805	0.662879
				2.81	0.663573
				2.815	0.664266
				2.82	0.664956
				2.825	0.665645
				2.83	0.666332
				2.835	0.667018
				2.84	0.667701
				2.845	0.668383
				2.85	0.669063
				2.855	0.669742
				2.86	0.670419
				2.865	0.671094
				2.87	0.671768
				2.875	0.67244
				2.88	0.67311
				2.885	0.673779
				2.89	0.674447
				2.895	0.675112
				2.9	0.675776
				2.905	0.676438
				2.91	0.677098
				2.915	0.677757
				2.92	0.678413
				2.925	0.679068
				2.93	0.679721
				2.935	0.680371
				2.94	0.68102
				2.945	0.681667
				2.95	0.682311
				2.955	0.682954
				2.96	0.683594
				2.965	0.684233
				2.97	0.684869
				2.975	0.685503
				2.98	0.686134
				2.985	0.686763
				2.99	0.68739
				2.995	0.688015
				3	0.688637
				3.005	0.689257
				3.01	0.689874
				3.015	0.690489
				3.02	0.691101
				3.025	0.691711
				3.03	0.692318
				3.035	0.692922
				3.04	0.693524
				3.045	0.694123
				3.05	0.694719
				3.055	0.695313
				3.06	0.695904
				3.065	0.696492
				3.07	0.697077
				3.075	0.697659
				3.08	0.698238
				3.085	0.698815
				3.09	0.699388
				3.095	0.699959
				3.1	0.700527
				3.105	0.701093
				3.11	0.701656
				3.115	0.702216
				3.12	0.702773
				3.125	0.703329
				3.13	0.703881
				3.135	0.704431
				3.14	0.704979
				3.145	0.705524
				3.15	0.706067
				3.155	0.706608
				3.16	0.707146
				3.165	0.707682
				3.17	0.708216
				3.175	0.708748
				3.18	0.709278
				3.185	0.709805
				3.19	0.710331
				3.195	0.710854
				3.2	0.711376
				3.205	0.711895
				3.21	0.712413
				3.215	0.712929
				3.22	0.713443
				3.225	0.713955
				3.23	0.714465
				3.235	0.714974
				3.24	0.715481
				3.245	0.715986
				3.25	0.71649
				3.255	0.716992
				3.26	0.717493
				3.265	0.717992
				3.27	0.718489
				3.275	0.718986
				3.28	0.719481
				3.285	0.719974
				3.29	0.720466
				3.295	0.720957
				3.3	0.721447
				3.305	0.721935
				3.31	0.722423
				3.315	0.722909
				3.32	0.723394
				3.325	0.723878
				3.33	0.724361
				3.335	0.724843
				3.34	0.725324
				3.345	0.725804
				3.35	0.726283
				3.355	0.726761
				3.36	0.727238
				3.365	0.727715
				3.37	0.72819
				3.375	0.728665
				3.38	0.729139
				3.385	0.729612
				3.39	0.730084
				3.395	0.730555
				3.4	0.731026
				3.405	0.731497
				3.41	0.731966
				3.415	0.732435
				3.42	0.732903
				3.425	0.733371
				3.43	0.733838
				3.435	0.734305
				3.44	0.734771
				3.445	0.735236
				3.45	0.735701
				3.455	0.736166
				3.46	0.73663
				3.465	0.737094
				3.47	0.737558
				3.475	0.738021
				3.48	0.738484
				3.485	0.738946
				3.49	0.739408
				3.495	0.73987
				3.5	0.740332
				3.505	0.740794
				3.51	0.741255
				3.515	0.741716
				3.52	0.742177
				3.525	0.742638
				3.53	0.743099
				3.535	0.74356
				3.54	0.744021
				3.545	0.744482
				3.55	0.744942
				3.555	0.745403
				3.56	0.745864
				3.565	0.746325
				3.57	0.746786
				3.575	0.747247
				3.58	0.747708
				3.585	0.748169
				3.59	0.748629
				3.595	0.74909
				3.6	0.74955
				3.605	0.75001
				3.61	0.75047
				3.615	0.750929
				3.62	0.751388
				3.625	0.751847
				3.63	0.752305
				3.635	0.752763
				3.64	0.753221
				3.645	0.753677
				3.65	0.754134
				3.655	0.75459
				3.66	0.755045
				3.665	0.755499
				3.67	0.755953
				3.675	0.756406
				3.68	0.756859
				3.685	0.75731
				3.69	0.757761
				3.695	0.758211
				3.7	0.75866
				3.705	0.759109
				3.71	0.759556
				3.715	0.760002
				3.72	0.760447
				3.725	0.760892
				3.73	0.761335
				3.735	0.761777
				3.74	0.762218
				3.745	0.762657
				3.75	0.763096
				3.755	0.763533
				3.76	0.763969
				3.765	0.764404
				3.77	0.764837
				3.775	0.765269
				3.78	0.765699
				3.785	0.766128
				3.79	0.766556
				3.795	0.766982
				3.8	0.767406
				3.805	0.767829
				3.81	0.768251
				3.815	0.76867
				3.82	0.769088
				3.825	0.769504
				3.83	0.769919
				3.835	0.770331
				3.84	0.770742
				3.845	0.771151
				3.85	0.771558
				3.855	0.771963
				3.86	0.772367
				3.865	0.772768
				3.87	0.773167
				3.875	0.773564
				3.88	0.773959
				3.885	0.774352
				3.89	0.774743
				3.895	0.775132
				3.9	0.775519
				3.905	0.775903
				3.91	0.776286
				3.915	0.776667
				3.92	0.777046
				3.925	0.777423
				3.93	0.777799
				3.935	0.778172
				3.94	0.778544
				3.945	0.778914
				3.95	0.779283
				3.955	0.779649
				3.96	0.780014
				3.965	0.780378
				3.97	0.78074
				3.975	0.7811
				3.98	0.781459
				3.985	0.781816
				3.99	0.782172
				3.995	0.782527
				4	0.78288
				4.005	0.783232
				4.01	0.783582
				4.015	0.783932
				4.02	0.78428
				4.025	0.784626
				4.03	0.784972
				4.035	0.785316
				4.04	0.78566
				4.045	0.786002
				4.05	0.786343
				4.055	0.786683
				4.06	0.787022
				4.065	0.78736
				4.07	0.787698
				4.075	0.788034
				4.08	0.788369
				4.085	0.788704
				4.09	0.789038
				4.095	0.789371
				4.1	0.789703
				4.105	0.790035
				4.11	0.790366
				4.115	0.790696
				4.12	0.791026
				4.125	0.791355
				4.13	0.791683
				4.135	0.792011
				4.14	0.792339
				4.145	0.792666
				4.15	0.792993
				4.155	0.793319
				4.16	0.793645
				4.165	0.79397
				4.17	0.794296
				4.175	0.794621
				4.18	0.794945
				4.185	0.795269
				4.19	0.795593
				4.195	0.795917
				4.2	0.79624
				4.205	0.796563
				4.21	0.796886
				4.215	0.797208
				4.22	0.79753
				4.225	0.797852
				4.23	0.798173
				4.235	0.798494
				4.24	0.798815
				4.245	0.799135
				4.25	0.799455
				4.255	0.799775
				4.26	0.800094
				4.265	0.800413
				4.27	0.800731
				4.275	0.801049
				4.28	0.801367
				4.285	0.801685
				4.29	0.802002
				4.295	0.802319
				4.3	0.802635
				4.305	0.802951
				4.31	0.803267
				4.315	0.803582
				4.32	0.803897
				4.325	0.804211
				4.33	0.804525
				4.335	0.804839
				4.34	0.805152
				4.345	0.805465
				4.35	0.805778
				4.355	0.80609
				4.36	0.806402
				4.365	0.806713
				4.37	0.807025
				4.375	0.807335
				4.38	0.807645
				4.385	0.807955
				4.39	0.808265
				4.395	0.808574
				4.4	0.808882
				4.405	0.809191
				4.41	0.809499
				4.415	0.809806
				4.42	0.810113
				4.425	0.81042
				4.43	0.810726
				4.435	0.811032
				4.44	0.811337
				4.445	0.811642
				4.45	0.811946
				4.455	0.81225
				4.46	0.812554
				4.465	0.812857
				4.47	0.81316
				4.475	0.813463
				4.48	0.813765
				4.485	0.814066
				4.49	0.814367
				4.495	0.814668
				4.5	0.814968
				4.505	0.815268
				4.51	0.815567
				4.515	0.815866
				4.52	0.816164
				4.525	0.816462
				4.53	0.81676
				4.535	0.817057
				4.54	0.817353
				4.545	0.81765
				4.55	0.817945
				4.555	0.81824
				4.56	0.818535
				4.565	0.81883
				4.57	0.819123
				4.575	0.819417
				4.58	0.81971
				4.585	0.820002
				4.59	0.820294
				4.595	0.820585
				4.6	0.820876
				4.605	0.821167
				4.61	0.821457
				4.615	0.821746
				4.62	0.822036
				4.625	0.822324
				4.63	0.822612
				4.635	0.8229
				4.64	0.823187
				4.645	0.823473
				4.65	0.823759
				4.655	0.824045
				4.66	0.82433
				4.665	0.824615
				4.67	0.824899
				4.675	0.825182
				4.68	0.825465
				4.685	0.825748
				4.69	0.82603
				4.695	0.826312
				4.7	0.826593
				4.705	0.826873
				4.71	0.827153
				4.715	0.827432
				4.72	0.827711
				4.725	0.82799
				4.73	0.828268
				4.735	0.828545
				4.74	0.828822
				4.745	0.829098
				4.75	0.829374
				4.755	0.829649
				4.76	0.829924
				4.765	0.830198
				4.77	0.830471
				4.775	0.830744
				4.78	0.831017
				4.785	0.831289
				4.79	0.83156
				4.795	0.831831
				4.8	0.832101
				4.805	0.832371
				4.81	0.83264
				4.815	0.832908
				4.82	0.833176
				4.825	0.833444
				4.83	0.833711
				4.835	0.833977
				4.84	0.834243
				4.845	0.834508
				4.85	0.834772
				4.855	0.835036
				4.86	0.8353
				4.865	0.835563
				4.87	0.835825
				4.875	0.836087
				4.88	0.836348
				4.885	0.836608
				4.89	0.836868
				4.895	0.837128
				4.9	0.837386
				4.905	0.837644
				4.91	0.837902
				4.915	0.838159
				4.92	0.838415
				4.925	0.838671
				4.93	0.838926
				4.935	0.839181
				4.94	0.839434
				4.945	0.839688
				4.95	0.83994
				4.955	0.840193
				4.96	0.840444
				4.965	0.840695
				4.97	0.840945
				4.975	0.841195
				4.98	0.841444
				4.985	0.841692
				4.99	0.84194
				4.995	0.842187
				5	0.842433
				5.005	0.842679
				5.01	0.842924
				5.015	0.843169
				5.02	0.843412
				5.025	0.843656
				5.03	0.843898
				5.035	0.84414
				5.04	0.844382
				5.045	0.844622
				5.05	0.844862
				5.055	0.845102
				5.06	0.84534
				5.065	0.845578
				5.07	0.845816
				5.075	0.846052
				5.08	0.846289
				5.085	0.846524
				5.09	0.846759
				5.095	0.846993
				5.1	0.847227
				5.105	0.84746
				5.11	0.847692
				5.115	0.847924
				5.12	0.848155
				5.125	0.848386
				5.13	0.848616
				5.135	0.848845
				5.14	0.849074
				5.145	0.849302
				5.15	0.84953
				5.155	0.849757
				5.16	0.849983
				5.165	0.850209
				5.17	0.850434
				5.175	0.850659
				5.18	0.850883
				5.185	0.851107
				5.19	0.85133
				5.195	0.851552
				5.2	0.851774
				5.205	0.851996
				5.21	0.852217
				5.215	0.852437
				5.22	0.852657
				5.225	0.852876
				5.23	0.853095
				5.235	0.853313
				5.24	0.853531
				5.245	0.853748
				5.25	0.853965
				5.255	0.854181
				5.26	0.854397
				5.265	0.854612
				5.27	0.854827
				5.275	0.855041
				5.28	0.855255
				5.285	0.855468
				5.29	0.855681
				5.295	0.855893
				5.3	0.856105
				5.305	0.856316
				5.31	0.856527
				5.315	0.856737
				5.32	0.856947
				5.325	0.857157
				5.33	0.857366
				5.335	0.857574
				5.34	0.857782
				5.345	0.85799
				5.35	0.858197
				5.355	0.858404
				5.36	0.858611
				5.365	0.858817
				5.37	0.859022
				5.375	0.859227
				5.38	0.859432
				5.385	0.859636
				5.39	0.85984
				5.395	0.860044
				5.4	0.860247
				5.405	0.86045
				5.41	0.860652
				5.415	0.860854
				5.42	0.861056
				5.425	0.861257
				5.43	0.861458
				5.435	0.861658
				5.44	0.861858
				5.445	0.862058
				5.45	0.862257
				5.455	0.862456
				5.46	0.862655
				5.465	0.862853
				5.47	0.863051
				5.475	0.863248
				5.48	0.863446
				5.485	0.863643
				5.49	0.863839
				5.495	0.864035
				5.5	0.864231
				5.505	0.864427
				5.51	0.864622
				5.515	0.864817
				5.52	0.865012
				5.525	0.865206
				5.53	0.8654
				5.535	0.865594
				5.54	0.865787
				5.545	0.86598
				5.55	0.866173
				5.555	0.866366
				5.56	0.866558
				5.565	0.86675
				5.57	0.866942
				5.575	0.867133
				5.58	0.867325
				5.585	0.867516
				5.59	0.867706
				5.595	0.867897
				5.6	0.868087
				5.605	0.868277
				5.61	0.868466
				5.615	0.868656
				5.62	0.868845
				5.625	0.869034
				5.63	0.869222
				5.635	0.869411
				5.64	0.869599
				5.645	0.869786
				5.65	0.869974
				5.655	0.870161
				5.66	0.870348
				5.665	0.870535
				5.67	0.870721
				5.675	0.870907
				5.68	0.871093
				5.685	0.871279
				5.69	0.871464
				5.695	0.871649
				5.7	0.871834
				5.705	0.872019
				5.71	0.872203
				5.715	0.872387
				5.72	0.872571
				5.725	0.872754
				5.73	0.872938
				5.735	0.873121
				5.74	0.873303
				5.745	0.873486
				5.75	0.873668
				5.755	0.87385
				5.76	0.874031
				5.765	0.874213
				5.77	0.874394
				5.775	0.874575
				5.78	0.874755
				5.785	0.874936
				5.79	0.875116
				5.795	0.875295
				5.8	0.875475
				5.805	0.875654
				5.81	0.875833
				5.815	0.876012
				5.82	0.87619
				5.825	0.876368
				5.83	0.876546
				5.835	0.876724
				5.84	0.876901
				5.845	0.877078
				5.85	0.877255
				5.855	0.877432
				5.86	0.877608
				5.865	0.877784
				5.87	0.87796
				5.875	0.878135
				5.88	0.878311
				5.885	0.878486
				5.89	0.87866
				5.895	0.878835
				5.9	0.879009
				5.905	0.879183
				5.91	0.879356
				5.915	0.87953
				5.92	0.879703
				5.925	0.879876
				5.93	0.880048
				5.935	0.88022
				5.94	0.880392
				5.945	0.880564
				5.95	0.880736
				5.955	0.880907
				5.96	0.881078
				5.965	0.881248
				5.97	0.881419
				5.975	0.881589
				5.98	0.881759
				5.985	0.881928
				5.99	0.882098
				5.995	0.882267
				6	0.882435
				6.005	0.882604
				6.01	0.882772
				6.015	0.88294
				6.02	0.883108
				6.025	0.883275
				6.03	0.883443
				6.035	0.883609
				6.04	0.883776
				6.045	0.883942
				6.05	0.884108
				6.055	0.884274
				6.06	0.88444
				6.065	0.884605
				6.07	0.88477
				6.075	0.884935
				6.08	0.885099
				6.085	0.885264
				6.09	0.885427
				6.095	0.885591
				6.1	0.885755
				6.105	0.885918
				6.11	0.886081
				6.115	0.886243
				6.12	0.886405
				6.125	0.886567
				6.13	0.886729
				6.135	0.886891
				6.14	0.887052
				6.145	0.887213
				6.15	0.887374
				6.155	0.887534
				6.16	0.887694
				6.165	0.887854
				6.17	0.888014
				6.175	0.888173
				6.18	0.888332
				6.185	0.888491
				6.19	0.888649
				6.195	0.888808
				6.2	0.888966
				6.205	0.889123
				6.21	0.889281
				6.215	0.889438
				6.22	0.889595
				6.225	0.889752
				6.23	0.889908
				6.235	0.890064
				6.24	0.89022
				6.245	0.890375
				6.25	0.890531
				6.255	0.890686
				6.26	0.89084
				6.265	0.890995
				6.27	0.891149
				6.275	0.891303
				6.28	0.891457
				6.285	0.89161
				6.29	0.891763
				6.295	0.891916
				6.3	0.892068
				6.305	0.892221
				6.31	0.892373
				6.315	0.892525
				6.32	0.892676
				6.325	0.892827
				6.33	0.892978
				6.335	0.893129
				6.34	0.893279
				6.345	0.893429
				6.35	0.893579
				6.355	0.893729
				6.36	0.893878
				6.365	0.894027
				6.37	0.894176
				6.375	0.894324
				6.38	0.894473
				6.385	0.89462
				6.39	0.894768
				6.395	0.894916
				6.4	0.895063
				6.405	0.89521
				6.41	0.895356
				6.415	0.895502
				6.42	0.895648
				6.425	0.895794
				6.43	0.89594
				6.435	0.896085
				6.44	0.89623
				6.445	0.896375
				6.45	0.896519
				6.455	0.896663
				6.46	0.896807
				6.465	0.896951
				6.47	0.897094
				6.475	0.897237
				6.48	0.89738
				6.485	0.897522
				6.49	0.897665
				6.495	0.897807
				6.5	0.897948
				6.505	0.89809
				6.51	0.898231
				6.515	0.898372
				6.52	0.898512
				6.525	0.898653
				6.53	0.898793
				6.535	0.898933
				6.54	0.899072
				6.545	0.899211
				6.55	0.89935
				6.555	0.899489
				6.56	0.899628
				6.565	0.899766
				6.57	0.899904
				6.575	0.900041
				6.58	0.900179
				6.585	0.900316
				6.59	0.900453
				6.595	0.900589
				6.6	0.900726
				6.605	0.900862
				6.61	0.900997
				6.615	0.901133
				6.62	0.901268
				6.625	0.901403
				6.63	0.901538
				6.635	0.901672
				6.64	0.901806
				6.645	0.90194
				6.65	0.902074
				6.655	0.902207
				6.66	0.90234
				6.665	0.902473
				6.67	0.902606
				6.675	0.902738
				6.68	0.90287
				6.685	0.903002
				6.69	0.903133
				6.695	0.903264
				6.7	0.903395
				6.705	0.903526
				6.71	0.903656
				6.715	0.903786
				6.72	0.903916
				6.725	0.904046
				6.73	0.904175
				6.735	0.904304
				6.74	0.904433
				6.745	0.904561
				6.75	0.90469
				6.755	0.904818
				6.76	0.904945
				6.765	0.905073
				6.77	0.9052
				6.775	0.905327
				6.78	0.905453
				6.785	0.90558
				6.79	0.905706
				6.795	0.905832
				6.8	0.905957
				6.805	0.906083
				6.81	0.906208
				6.815	0.906332
				6.82	0.906457
				6.825	0.906581
				6.83	0.906705
				6.835	0.906829
				6.84	0.906952
				6.845	0.907075
				6.85	0.907198
				6.855	0.907321
				6.86	0.907443
				6.865	0.907565
				6.87	0.907687
				6.875	0.907808
				6.88	0.90793
				6.885	0.908051
				6.89	0.908172
				6.895	0.908292
				6.9	0.908412
				6.905	0.908532
				6.91	0.908652
				6.915	0.908771
				6.92	0.90889
				6.925	0.909009
				6.93	0.909128
				6.935	0.909246
				6.94	0.909364
				6.945	0.909482
				6.95	0.9096
				6.955	0.909717
				6.96	0.909834
				6.965	0.909951
				6.97	0.910067
				6.975	0.910183
				6.98	0.910299
				6.985	0.910415
				6.99	0.91053
				6.995	0.910646
				7	0.91076
				7.005	0.910875
				7.01	0.910989
				7.015	0.911104
				7.02	0.911217
				7.025	0.911331
				7.03	0.911444
				7.035	0.911557
				7.04	0.91167
				7.045	0.911783
				7.05	0.911895
				7.055	0.912007
				7.06	0.912119
				7.065	0.912231
				7.07	0.912342
				7.075	0.912453
				7.08	0.912564
				7.085	0.912674
				7.09	0.912785
				7.095	0.912895
				7.1	0.913005
				7.105	0.913115
				7.11	0.913224
				7.115	0.913333
				7.12	0.913442
				7.125	0.913551
				7.13	0.91366
				7.135	0.913768
				7.14	0.913876
				7.145	0.913984
				7.15	0.914091
				7.155	0.914199
				7.16	0.914306
				7.165	0.914413
				7.17	0.91452
				7.175	0.914626
				7.18	0.914733
				7.185	0.914839
				7.19	0.914945
				7.195	0.915051
				7.2	0.915156
				7.205	0.915262
				7.21	0.915367
				7.215	0.915472
				7.22	0.915576
				7.225	0.915681
				7.23	0.915785
				7.235	0.915889
				7.24	0.915993
				7.245	0.916097
				7.25	0.916201
				7.255	0.916304
				7.26	0.916407
				7.265	0.91651
				7.27	0.916613
				7.275	0.916716
				7.28	0.916818
				7.285	0.91692
				7.29	0.917022
				7.295	0.917124
				7.3	0.917226
				7.305	0.917328
				7.31	0.917429
				7.315	0.91753
				7.32	0.917631
				7.325	0.917732
				7.33	0.917833
				7.335	0.917934
				7.34	0.918034
				7.345	0.918134
				7.35	0.918234
				7.355	0.918334
				7.36	0.918434
				7.365	0.918534
				7.37	0.918633
				7.375	0.918733
				7.38	0.918832
				7.385	0.918931
				7.39	0.91903
				7.395	0.919128
				7.4	0.919227
				7.405	0.919325
				7.41	0.919424
				7.415	0.919522
				7.42	0.91962
				7.425	0.919718
				7.43	0.919815
				7.435	0.919913
				7.44	0.92001
				7.445	0.920108
				7.45	0.920205
				7.455	0.920302
				7.46	0.920399
				7.465	0.920496
				7.47	0.920592
				7.475	0.920689
				7.48	0.920786
				7.485	0.920882
				7.49	0.920978
				7.495	0.921074
				7.5	0.92117
				7.505	0.921266
				7.51	0.921362
				7.515	0.921457
				7.52	0.921553
				7.525	0.921648
				7.53	0.921744
				7.535	0.921839
				7.54	0.921934
				7.545	0.922029
				7.55	0.922124
				7.555	0.922219
				7.56	0.922314
				7.565	0.922408
				7.57	0.922503
				7.575	0.922597
				7.58	0.922692
				7.585	0.922786
				7.59	0.92288
				7.595	0.922974
				7.6	0.923068
				7.605	0.923162
				7.61	0.923256
				7.615	0.92335
				7.62	0.923443
				7.625	0.923537
				7.63	0.92363
				7.635	0.923724
				7.64	0.923817
				7.645	0.92391
				7.65	0.924004
				7.655	0.924097
				7.66	0.92419
				7.665	0.924283
				7.67	0.924376
				7.675	0.924469
				7.68	0.924562
				7.685	0.924654
				7.69	0.924747
				7.695	0.92484
				7.7	0.924932
				7.705	0.925025
				7.71	0.925118
				7.715	0.92521
				7.72	0.925302
				7.725	0.925395
				7.73	0.925487
				7.735	0.925579
				7.74	0.925672
				7.745	0.925764
				7.75	0.925856
				7.755	0.925948
				7.76	0.92604
				7.765	0.926132
				7.77	0.926224
				7.775	0.926316
				7.78	0.926408
				7.785	0.9265
				7.79	0.926592
				7.795	0.926684
				7.8	0.926775
				7.805	0.926867
				7.81	0.926959
				7.815	0.927051
				7.82	0.927142
				7.825	0.927234
				7.83	0.927326
				7.835	0.927418
				7.84	0.927509
				7.845	0.927601
				7.85	0.927693
				7.855	0.927784
				7.86	0.927876
				7.865	0.927967
				7.87	0.928059
				7.875	0.928151
				7.88	0.928242
				7.885	0.928334
				7.89	0.928426
				7.895	0.928517
				7.9	0.928609
				7.905	0.9287
				7.91	0.928792
				7.915	0.928884
				7.92	0.928975
				7.925	0.929067
				7.93	0.929159
				7.935	0.92925
				7.94	0.929342
				7.945	0.929434
				7.95	0.929526
				7.955	0.929617
				7.96	0.929709
				7.965	0.929801
				7.97	0.929892
				7.975	0.929984
				7.98	0.930076
				7.985	0.930167
				7.99	0.930259
				7.995	0.930351
				8	0.930442
				8.005	0.930534
				8.01	0.930626
				8.015	0.930717
				8.02	0.930809
				8.025	0.9309
				8.03	0.930992
				8.035	0.931084
				8.04	0.931175
				8.045	0.931267
				8.05	0.931358
				8.055	0.931449
				8.06	0.931541
				8.065	0.931632
				8.07	0.931724
				8.075	0.931815
				8.08	0.931906
				8.085	0.931997
				8.09	0.932089
				8.095	0.93218
				8.1	0.932271
				8.105	0.932362
				8.11	0.932453
				8.115	0.932544
				8.12	0.932635
				8.125	0.932726
				8.13	0.932816
				8.135	0.932907
				8.14	0.932998
				8.145	0.933089
				8.15	0.933179
				8.155	0.93327
				8.16	0.93336
				8.165	0.933451
				8.17	0.933541
				8.175	0.933631
				8.18	0.933721
				8.185	0.933812
				8.19	0.933902
				8.195	0.933992
				8.2	0.934082
				8.205	0.934171
				8.21	0.934261
				8.215	0.934351
				8.22	0.93444
				8.225	0.93453
				8.23	0.934619
				8.235	0.934709
				8.24	0.934798
				8.245	0.934887
				8.25	0.934976
				8.255	0.935065
				8.26	0.935154
				8.265	0.935243
				8.27	0.935332
				8.275	0.935421
				8.28	0.935509
				8.285	0.935598
				8.29	0.935686
				8.295	0.935774
				8.3	0.935862
				8.305	0.93595
				8.31	0.936038
				8.315	0.936126
				8.32	0.936214
				8.325	0.936301
				8.33	0.936389
				8.335	0.936476
				8.34	0.936564
				8.345	0.936651
				8.35	0.936738
				8.355	0.936825
				8.36	0.936911
				8.365	0.936998
				8.37	0.937085
				8.375	0.937171
				8.38	0.937257
				8.385	0.937343
				8.39	0.937429
				8.395	0.937515
				8.4	0.937601
				8.405	0.937687
				8.41	0.937772
				8.415	0.937857
				8.42	0.937943
				8.425	0.938028
				8.43	0.938113
				8.435	0.938197
				8.44	0.938282
				8.445	0.938366
				8.45	0.938451
				8.455	0.938535
				8.46	0.938619
				8.465	0.938703
				8.47	0.938786
				8.475	0.93887
				8.48	0.938953
				8.485	0.939037
				8.49	0.93912
				8.495	0.939202
				8.5	0.939285
				8.505	0.939368
				8.51	0.93945
				8.515	0.939532
				8.52	0.939614
				8.525	0.939696
				8.53	0.939778
				8.535	0.939859
				8.54	0.939941
				8.545	0.940022
				8.55	0.940103
				8.555	0.940184
				8.56	0.940264
				8.565	0.940345
				8.57	0.940425
				8.575	0.940505
				8.58	0.940585
				8.585	0.940665
				8.59	0.940744
				8.595	0.940823
				8.6	0.940902
				8.605	0.940981
				8.61	0.94106
				8.615	0.941139
				8.62	0.941217
				8.625	0.941295
				8.63	0.941373
				8.635	0.94145
				8.64	0.941528
				8.645	0.941605
				8.65	0.941682
				8.655	0.941759
				8.66	0.941836
				8.665	0.941912
				8.67	0.941988
				8.675	0.942064
				8.68	0.94214
				8.685	0.942215
				8.69	0.942291
				8.695	0.942366
				8.7	0.942441
				8.705	0.942515
				8.71	0.94259
				8.715	0.942664
				8.72	0.942738
				8.725	0.942811
				8.73	0.942885
				8.735	0.942958
				8.74	0.943031
				8.745	0.943104
				8.75	0.943176
				8.755	0.943248
				8.76	0.94332
				8.765	0.943392
				8.77	0.943464
				8.775	0.943535
				8.78	0.943606
				8.785	0.943677
				8.79	0.943747
				8.795	0.943817
				8.8	0.943887
				8.805	0.943957
				8.81	0.944026
				8.815	0.944096
				8.82	0.944165
				8.825	0.944233
				8.83	0.944302
				8.835	0.94437
				8.84	0.944438
				8.845	0.944505
				8.85	0.944573
				8.855	0.94464
				8.86	0.944706
				8.865	0.944773
				8.87	0.944839
				8.875	0.944905
				8.88	0.944971
				8.885	0.945036
				8.89	0.945101
				8.895	0.945166
				8.9	0.945231
				8.905	0.945295
				8.91	0.94536
				8.915	0.945424
				8.92	0.945487
				8.925	0.945551
				8.93	0.945614
				8.935	0.945677
				8.94	0.94574
				8.945	0.945802
				8.95	0.945865
				8.955	0.945927
				8.96	0.945989
				8.965	0.94605
				8.97	0.946112
				8.975	0.946173
				8.98	0.946234
				8.985	0.946295
				8.99	0.946355
				8.995	0.946416
				9	0.946476
				9.005	0.946536
				9.01	0.946596
				9.015	0.946655
				9.02	0.946715
				9.025	0.946774
				9.03	0.946833
				9.035	0.946892
				9.04	0.946951
				9.045	0.947009
				9.05	0.947068
				9.055	0.947126
				9.06	0.947184
				9.065	0.947242
				9.07	0.947299
				9.075	0.947357
				9.08	0.947414
				9.085	0.947472
				9.09	0.947529
				9.095	0.947585
				9.1	0.947642
				9.105	0.947699
				9.11	0.947755
				9.115	0.947812
				9.12	0.947868
				9.125	0.947924
				9.13	0.94798
				9.135	0.948036
				9.14	0.948091
				9.145	0.948147
				9.15	0.948202
				9.155	0.948257
				9.16	0.948313
				9.165	0.948368
				9.17	0.948423
				9.175	0.948477
				9.18	0.948532
				9.185	0.948587
				9.19	0.948641
				9.195	0.948696
				9.2	0.94875
				9.205	0.948804
				9.21	0.948858
				9.215	0.948913
				9.22	0.948966
				9.225	0.94902
				9.23	0.949074
				9.235	0.949128
				9.24	0.949181
				9.245	0.949235
				9.25	0.949289
				9.255	0.949342
				9.26	0.949395
				9.265	0.949449
				9.27	0.949502
				9.275	0.949555
				9.28	0.949608
				9.285	0.949661
				9.29	0.949714
				9.295	0.949767
				9.3	0.94982
				9.305	0.949873
				9.31	0.949926
				9.315	0.949979
				9.32	0.950031
				9.325	0.950084
				9.33	0.950137
				9.335	0.950189
				9.34	0.950242
				9.345	0.950295
				9.35	0.950347
				9.355	0.9504
				9.36	0.950452
				9.365	0.950505
				9.37	0.950557
				9.375	0.95061
				9.38	0.950662
				9.385	0.950715
				9.39	0.950767
				9.395	0.95082
				9.4	0.950872
				9.405	0.950925
				9.41	0.950978
				9.415	0.95103
				9.42	0.951083
				9.425	0.951135
				9.43	0.951188
				9.435	0.95124
				9.44	0.951293
				9.445	0.951346
				9.45	0.951399
				9.455	0.951451
				9.46	0.951504
				9.465	0.951557
				9.47	0.95161
				9.475	0.951663
				9.48	0.951716
				9.485	0.951769
				9.49	0.951822
				9.495	0.951875
				9.5	0.951928
				9.505	0.951981
				9.51	0.952034
				9.515	0.952088
				9.52	0.952141
				9.525	0.952195
				9.53	0.952248
				9.535	0.952302
				9.54	0.952355
				9.545	0.952409
				9.55	0.952463
				9.555	0.952517
				9.56	0.952571
				9.565	0.952625
				9.57	0.952679
				9.575	0.952734
				9.58	0.952788
				9.585	0.952842
				9.59	0.952897
				9.595	0.952952
				9.6	0.953007
				9.605	0.953062
				9.61	0.953117
				9.615	0.953172
				9.62	0.953227
				9.625	0.953282
				9.63	0.953338
				9.635	0.953393
				9.64	0.953449
				9.645	0.953505
				9.65	0.953561
				9.655	0.953617
				9.66	0.953674
				9.665	0.95373
				9.67	0.953787
				9.675	0.953843
				9.68	0.9539
				9.685	0.953957
				9.69	0.954014
				9.695	0.954072
				9.7	0.954129
				9.705	0.954187
				9.71	0.954245
				9.715	0.954302
				9.72	0.954361
				9.725	0.954419
				9.73	0.954477
				9.735	0.954536
				9.74	0.954594
				9.745	0.954653
				9.75	0.954712
				9.755	0.954771
				9.76	0.95483
				9.765	0.95489
				9.77	0.954949
				9.775	0.955008
				9.78	0.955068
				9.785	0.955128
				9.79	0.955188
				9.795	0.955248
				9.8	0.955308
				9.805	0.955368
				9.81	0.955428
				9.815	0.955488
				9.82	0.955549
				9.825	0.955609
				9.83	0.95567
				9.835	0.95573
				9.84	0.955791
				9.845	0.955852
				9.85	0.955913
				9.855	0.955974
				9.86	0.956035
				9.865	0.956096
				9.87	0.956157
				9.875	0.956218
				9.88	0.956279
				9.885	0.956341
				9.89	0.956402
				9.895	0.956463
				9.9	0.956525
				9.905	0.956586
				9.91	0.956647
				9.915	0.956709
				9.92	0.95677
				9.925	0.956832
				9.93	0.956893
				9.935	0.956955
				9.94	0.957016
				9.945	0.957078
				9.95	0.95714
				9.955	0.957201
				9.96	0.957263
				9.965	0.957324
				9.97	0.957386
				9.975	0.957448
				9.98	0.957509
				9.985	0.957571
				9.99	0.957632
[truncated: 2,802 more rows]
